# Supplementary material
Source: Research Square preprint supplement (doi:10.21203/rs.3.rs-9720828/v1)
Supplement: Supplementary file 1 [file 53e47e43ddde553d8e8a46e2.docx]

# Appendix

Table A1. Summary of high-frequency textual keywords and evaluative descriptors

| **No.** | High-Frequency Keywords | **Freq.** | **No.** | High-Frequency Descriptors | **Freq.** |
| --- | --- | --- | --- | --- | --- |
| 1 | Guesthouse | 1696 | 1 | Happiness | 627 |
| 2 | Ancient Trees | 1483 | 2 | Beautiful | 565 |
| 3 | Local Specialties① | 1324 | 3 | Famous | 518 |
| 4 | Culture② | 1175 | 4 | Ordinary | 517 |
| 5 | Rural Farmland | 1022 | 5 | Unique | 471 |
| 6 | Residential Dwellings | 936 | 6 | Natural | 462 |
| 7 | Coffee Shop | 936 | 7 | Antique | 350 |
| 8 | Historic Alleyway | 853 | 8 | Rich | 343 |
| 9 | Museum | 845 | 9 | Decent | 339 |
| 10 | Local Cuisine③ | 818 | 10 | Hiking | 307 |
| 11 | Heshun Library | 817 | 11 | Relaxing | 249 |
| 12 | Ancestral Hall | 694 | 12 | Harmonious | 248 |
| 13 | Stream | 626 | 13 | Leisurely | 244 |
| 14 | Ming and Qing Dynasties | 556 | 14 | Average | 213 |
| 15 | Morning Market | 329 | 15 | Most Beautiful | 210 |
| 16 | Commemorative Archway (*pailou*) | 323 | 16 | Laid-back | 186 |
| 17 | Temple | 319 | 17 | Romantic | 169 |
| 18 | Lotus Pond | 308 | 18 | Rustic Charm | 147 |
| 19 | Jiangnan Water-town Landscape | 287 | 19 | Comfortable | 146 |
| 20 | Arched Stone Bridge | 271 | 20 | Lively | 139 |
| 21 | Restaurant | 239 | 21 | Convenient | 137 |
| 22 | Laundry Pavilion | 226 | 22 | Perfect | 135 |
| 23 | Handicraft Making④ | 222 | 23 | Authentic | 133 |
| 24 | Mountain-water Integrated Setting | 219 | 24 | Gentle | 133 |
| 25 | Integration of Chinese and Western Styles | 209 | 25 | Free | 133 |
| 26 | White Walls and Dark Tiles | 201 | 26 | Joyful | 126 |
| 27 | Huizhou-style Architecture | 175 | 27 | Yearning | 115 |
| 28 | Cultural and Creative Products | 113 | 28 | Graceful | 112 |
| 29 | Heritage Promenade | 112 | 29 | Profound | 111 |
| 30 | Courtyard | 105 | 30 | Abundant | 111 |
| 31 | Volcanic Stone | 93 | 31 | Magical | 104 |
| 32 | Parking Lot | 89 | 32 | Elegant and Refined | 104 |
| 33 | Sunken River Wetland | 81 | 33 | Surprising | 103 |
| 34 | Stone Stele | 76 | 34 | Clean | 95 |
| 35 | Moon Platform | 70 | 35 | Affordable | 95 |
| 36 | Screen Wall (*zhaobi*) | 57 | 36 | Breathtaking | 91 |
| 37 | Garden Pavilion | 42 | 37 | Refreshing | 91 |
| 38 | Family Moral Culture Corridor | 36 | 38 | Refreshing | 86 |
| 39 | Teahouse | 35 | 39 | Over-commercialized | 85 |
| 40 | Visitor Center | 26 | 40 | Spectacular | 82 |
| 41 | Festival Activities⑤ | 26 | 41 | Scenic Beauty | 81 |
| 42 | Restroom | 22 | 42 | Elegance | 76 |
| 43 | Opera Stage | 19 | 43 | Melodiousness | 75 |
| 44 | Neighborhood Gateway (*lǘmén*) | 17 | 44 | Physical Fatigue | 60 |
| 45 | Former Residence | 9 | 45 | Exquisiteness | 48 |
| 46 | Directional Signage | 5 | 46 | Luminous Beauty | 18 |

Note：

| ①Local Specialties | Tea, Jadeite. |
| --- | --- |
| ②Culture | Family Tradition Culture, Overseas Chinese Homeland Culture, Caravan Culture, Xu Xiake's Travels. |
| ③Local Cuisine | Pea Porridge (*Xidoufen*), Rice Noodles (*Ersi*), Stir-fried Rice Cakes (*Dajiujia*), Medicated Mutton Soup (*Tounao*), Pine Pollen Cake (*Songhuagao*), Earthenware Pot (*Tuguozi*), Copper Pot Beef. |
| ④Handicraft Making | Rattan Weaving, Traditional Papermaking, Shadow Puppetry, Roasted Tea Ceremony, Oil-paper Umbrella Making, Wood Carving, Silver Jewelry Making. |
| ⑤Festive Activities | Heshun Spring Festival, Caravan Folk Song Festival, "Qiaoxiangqing" Festival. |

Table A2. Prompt text templates and fine-grained visual lexicon for CLIP scene classification

| Theme | Primary Scene | Fine-Grained Element Labels |
| --- | --- | --- |
| Built Environment | Architecture | 1.White Walls and Dark Tiles |
| 2.Timber Structural Components |
| 3.Building Façades |
| 4.Carved Decorations |
| 5.Courtyards |
| Streets and Alleys | 1.Stone Paving |
| 2.Narrow Linear Spaces |
| 3.Continuous Building Façades |
| 4.White Walls and Dark Tiles |
| 5.Timber Structural Components |
| Bridges and Pavilions | 1.Bridge Arches |
| 2.Stone Railings |
| 3.Stone Paving |
| 4.Water Bodies |
| Natural Environment | Water Systems | 1.Water Bodies |
| 2.Riverbanks |
| 3.Building Façades |
| 4.Water Reflections |
| 5.Boats |
| Mountains and Forests | 1.Mountain Silhouettes |
| 2.Woodlands |
| 3.Dense Vegetation |
| 4.Building Façades |
| Tourism Services and Consumption | Commercial Facilities | 1.Commercial Facilities |
| 2.Signboards |
| 3.Stalls and Booths |
| 4.Decorative Lighting |
| Catering Facilities | 1.Clustered Seating |
| 2.Food Displays |
| 3.Stalls and Booths |
| 4.Queuing Circulation |
| 5.Handicraft Displays |
| Service Facilities | 1.Tourist Signage |
| 2.Parking Areas |
| 3.Crowd Control Facilities |
| Historical and Folk Culture | Festivals and Events | 1.Traditional Folk Festivals |
| 2.Theatrical Performances |
| 3.Intangible Cultural Heritage Handicrafts |
